# Supplementary material for: Molecular and Physiological Effects of 17α-methyltestosterone on Sex Differentiation of Black Rockfish, Sebastes schlegelii
Source: MDPI journal article supplement (doi:10.3390/genes15050605), 2024-05-09
Supplement: s1 [file s1]

## Supplementary Material

**Table S1.** Primers used in this study

| Primers            | Sequence (5'→ 3')       | Usage                     |
|--------------------|-------------------------|---------------------------|
| Sex-marker-F       | GTAAACCAAGAACTGAGGAGGAG | Genetic sex determination |
| Sex-marker-R       | GAGAAAAGCAGAAGTGGAATCA  |                           |
| <i>amh</i> -F      | AGCCTCACCGTGTCCCTA      | qRT-PCR                   |
| <i>amh</i> -R      | TCCCGTGTTTCGTTCAAGTC    |                           |
| <i>sox9</i> -F     | AGAGGCTCCTTCCATCCG      | qRT-PCR                   |
| <i>sox9</i> -R     | AGCACGCCAGACTCAGAC      |                           |
| <i>cyp19a1a</i> -F | CGCTGCACCGTAGTCGACAT    | qRT-PCR                   |
| <i>cyp19a1a</i> -R | GCGATCACCATCTCCAACAC    |                           |
| <i>foxl2</i> -F    | CGACCAAGGAGAAAGAGCGA    | qRT-PCR                   |
| <i>foxl2</i> -R    | GCGATGAGAGCCACATAGGA    |                           |
| <i>vasa</i> -F     | GCAATGTGGTGTGTGGAACC    | qRT-PCR                   |
| <i>vasa</i> -R     | TCTGGCGGTTCTCTTTGGAC    |                           |
| $\beta$ -actin-F   | CGGTATGGGCCAGAAAGACA    | qRT-PCR                   |
| $\beta$ -actin-R   | GGTGACGATACCGTGCTCAA    |                           |

**Table S2.** Sequencing data statistics

| Samples     | Raw data/Gb | Clean data/Gb | Q20/% | Q30/% | GC/%  | Total Map/% | Exon/% | Intron/% | Intergenic/% |
|-------------|-------------|---------------|-------|-------|-------|-------------|--------|----------|--------------|
| female1     | 5.89        | 5.88          | 97.94 | 94.41 | 50.36 | 88.32       | 62.40  | 4.31     | 33.29        |
| female2     | 6.40        | 6.39          | 98.04 | 94.65 | 50.04 | 88.06       | 61.75  | 4.60     | 33.66        |
| female3     | 6.29        | 6.26          | 98.88 | 96.98 | 51.18 | 89.84       | 66.23  | 4.20     | 29.57        |
| male1       | 7.56        | 6.99          | 98.00 | 94.59 | 48.83 | 90.82       | 52.87  | 4.97     | 42.16        |
| male2       | 7.50        | 6.82          | 97.89 | 94.33 | 48.65 | 87.64       | 52.62  | 4.55     | 42.83        |
| male3       | 6.72        | 6.13          | 97.84 | 94.21 | 49.40 | 87.88       | 53.28  | 4.85     | 41.87        |
| pseudomale1 | 6.62        | 6.61          | 97.92 | 94.44 | 48.53 | 88.16       | 49.43  | 4.16     | 46.41        |
| pseudomale2 | 7.05        | 6.64          | 97.85 | 94.30 | 48.53 | 89.59       | 50.88  | 5.42     | 43.71        |
| pseudomale3 | 6.40        | 5.97          | 97.81 | 94.21 | 48.88 | 89.42       | 51.70  | 4.70     | 43.60        |

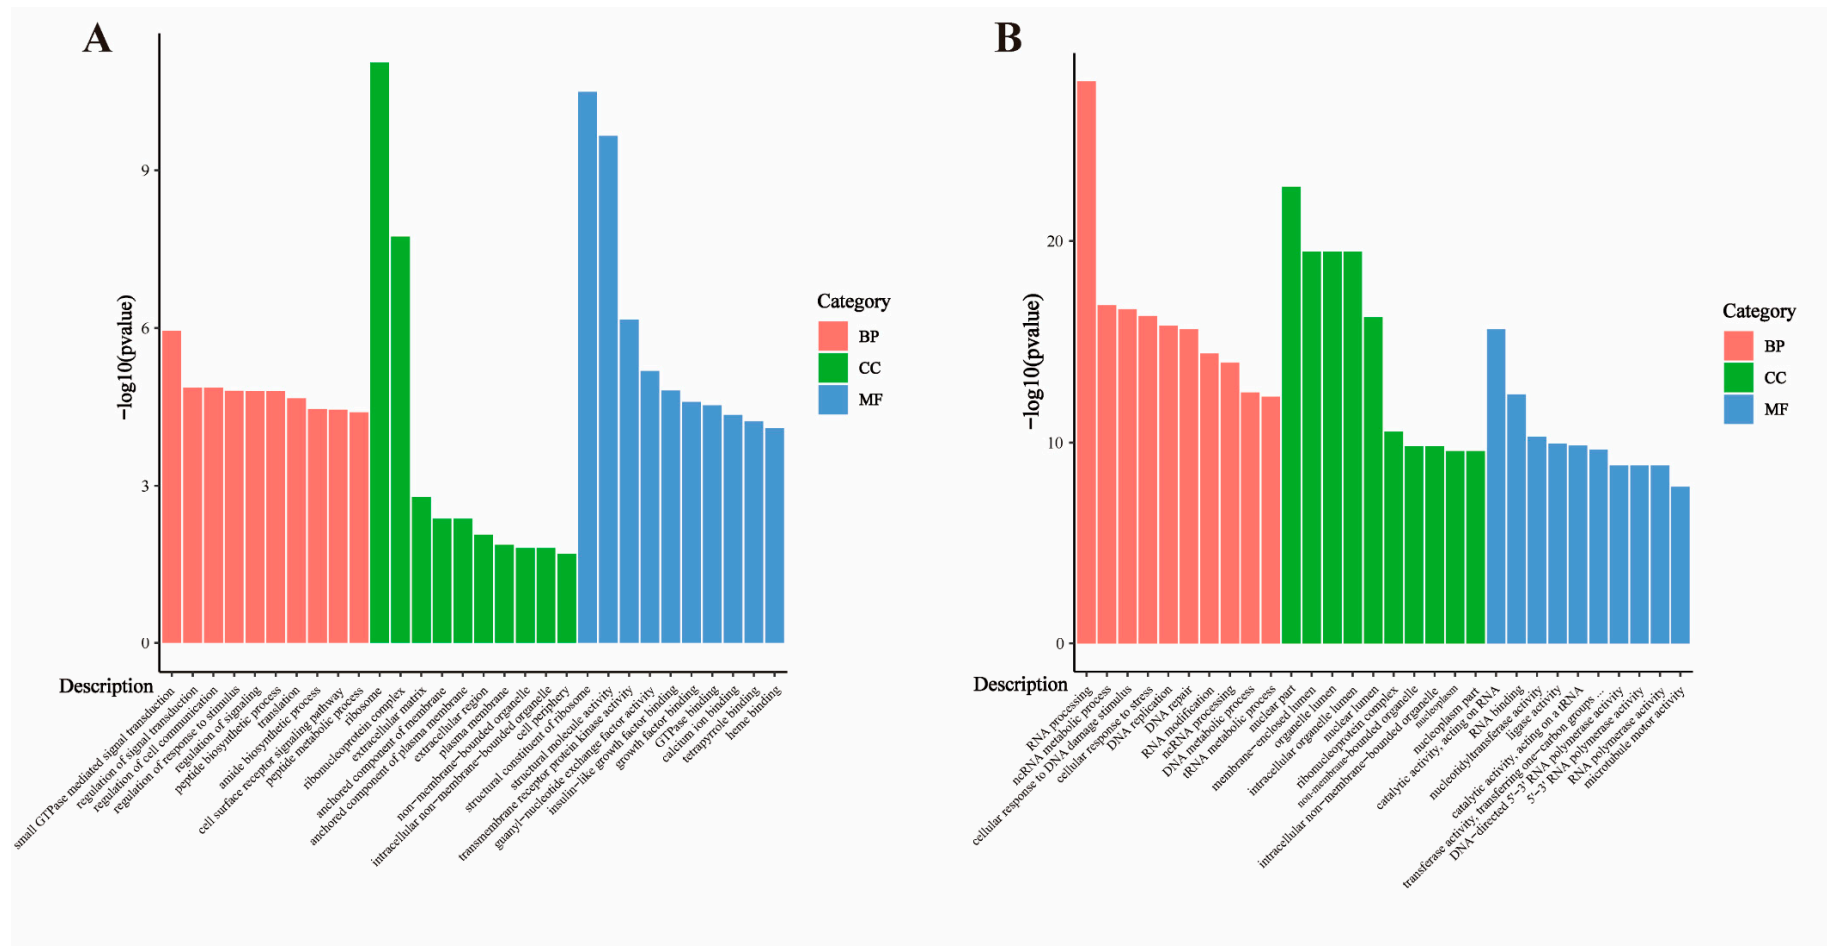

**Figure S1.** GO enrichment analysis of upregulated (co-up) and downregulated (co-down) DEGs followed. (A) GO of DEGs co-up by pseudomale vs. female and male vs. female. (B) GO of DEGs co-down by pseudomale vs. female and male vs. female.

**Table S3.** GO term related to cell cycle and meiosis enriched by co-down-regulated DEGs.

| Category | GOID       | Description                       | GeneRatio | BgRatio | pvalue      | padj        | Count |
|----------|------------|-----------------------------------|-----------|---------|-------------|-------------|-------|
| BP       | GO:0007049 | cell cycle                        | 33/1260   | 58/7699 | 2.07E-12    | 9.14E-11    | 33    |
| BP       | GO:0022402 | cell cycle process                | 22/1260   | 38/7699 | 6.68E-09    | 1.69E-07    | 22    |
| BP       | GO:0051321 | meiotic cell cycle                | 9/1260    | 10/7699 | 7.02E-07    | 1.28E-05    | 9     |
| BP       | GO:0000278 | mitotic cell cycle                | 11/1260   | 18/7699 | 2.25E-05    | 0.000290578 | 11    |
| BP       | GO:0051726 | regulation of cell cycle          | 14/1260   | 32/7699 | 0.000233685 | 0.002223101 | 14    |
| BP       | GO:0010564 | regulation of cell cycle process  | 7/1260    | 10/7699 | 0.000234894 | 0.002223101 | 7     |
| BP       | GO:0045786 | negative regulation of cell cycle | 10/1260   | 21/7699 | 0.000823647 | 0.006515417 | 10    |
| BP       | GO:1903047 | mitotic cell cycle process        | 8/1260    | 15/7699 | 0.001096506 | 0.008546296 | 8     |
| BP       | GO:0000075 | cell cycle checkpoint             | 7/1260    | 12/7699 | 0.001143334 | 0.008782131 | 7     |
